# Supplementary material for: The Efficacy of Upfront Intracranial Radiation with TKI Compared to TKI Alone in the NSCLC Patients Harboring EGFR Mutation and Brain Metastases
Source: PubMed Central journal article supplement — J Cancer. 2019 May 12;10(9):1985–90. doi: 10.7150/jca.30131 (PMC6548172; doi:10.7150/jca.30131), 2019-05-12
Supplement: jcav10p1985s1.pdf [file jcav10p1985s1.pdf]

Supplementary Table 1. Univariable and Multivariable Analyses of Covariables Associated With Intracranial Progression-Free Survival (competing risks regression)

| Variable                                   | Univariable analysis |              |       | Multivariable analysis |              |       |
|--------------------------------------------|----------------------|--------------|-------|------------------------|--------------|-------|
|                                            | SHR                  | 95%CI        | P     | SHR                    | 95%CI        | P     |
| Up front RT vs TKI                         | 0.57                 | 0.32 to 1.00 | 0.053 | 0.38                   | 0.19 to 0.75 | 0.006 |
| Age at BM (years)                          |                      |              |       |                        |              |       |
| 50-60 vs <50                               | 1.08                 | 0.51 to 2.22 | 0.84  |                        |              |       |
| >60 vs <50                                 | 1.02                 | 0.51 to 2.04 | 0.96  |                        |              |       |
| Gender                                     |                      |              |       |                        |              |       |
| Male vs Female                             | 0.774                | 0.44 to 1.36 | 0.38  |                        |              |       |
| KPS                                        |                      |              |       |                        |              |       |
| 70-80 vs 90-100                            | 1.03                 | 0.33 to 3.23 | 0.96  |                        |              |       |
| Smoking history                            |                      |              |       |                        |              |       |
| Yes vs No                                  | 0.92                 | 0.50 to 1.62 | 0.73  |                        |              |       |
| No. of BMs                                 |                      |              |       |                        |              |       |
| 4-10 vs 1-3                                | 1.06                 | 0.58 to 1.94 | 0.854 | 1.35                   | 0.71 to 2.56 | 0.35  |
| >10 vs 1-3                                 | 2.55                 | 1.19 to 5.48 | 0.016 | 2.86                   | 1.29 to 6.33 | 0.01  |
| Extracranial metastases at the time of BMs |                      |              |       |                        |              |       |
| Yes vs No                                  | 1.08                 | 0.60 to 1.95 | 0.791 |                        |              |       |
| Stage                                      |                      |              |       |                        |              |       |
| IV vs I-III                                | 0.6                  | 0.29 to 1.10 | 0.091 | 0.36                   | 0.17 to 0.76 | 0.007 |
| Largest size of BM                         |                      |              |       |                        |              |       |
| >10 vs ≤10 mm                              | 1.23                 | 0.65 to 2.35 | 0.52  |                        |              |       |
| Disease-specific GPA                       |                      |              |       |                        |              |       |
| 0-1.5 vs 2.0-4.0                           | 0.95                 | 0.52 to 1.67 | 0.87  |                        |              |       |
| Symptom from BM                            |                      |              |       |                        |              |       |
| Yes vs No                                  | 1.06                 | 0.57 to 1.97 | 0.85  |                        |              |       |
| Mutation                                   |                      |              |       |                        |              |       |
| Exon 21 L858R and others vs 19 mutation    | 1.01                 | 0.68 to 1.77 | 0.97  |                        |              |       |

Abbreviations: KPS, Karnofsky Performance Score; BM, brain metastasis; GPA, graded prognostic assessment; RT, radiation therapy; TKI, tyrosine kinase inhibitor; EGFR, epidermal growth factor receptor; TKI, tyrosine kinase inhibitor.

Supplementary Table 2. Univariable and Multivariable Analyses of Covariables Associated With OS

| Variable                                | Univariable analysis |              |       | Multivariable analysis |              |       |
|-----------------------------------------|----------------------|--------------|-------|------------------------|--------------|-------|
|                                         | HR                   | 95%CI        | P     | HR                     | 95%CI        | P     |
| Up front RT vs TKI                      | 1.13                 | 0.61 to 2.09 | 0.695 |                        |              |       |
| Age at BM (years)                       |                      |              |       |                        |              |       |
| 50-60 vs <50                            | 1.68                 | 0.76 to 3.72 | 0.198 |                        |              |       |
| >60 vs <50                              | 1.23                 | 0.54 to 2.76 | 0.616 |                        |              |       |
| Gender                                  |                      |              |       |                        |              |       |
| Male vs Female                          | 1.14                 | 0.63 to 2.07 | 0.662 |                        |              |       |
| KPS                                     |                      |              |       |                        |              |       |
| 70-80 vs 90-100                         | 0.79                 | 0.41 to 1.55 | 0.497 |                        |              |       |
| Smoking history                         |                      |              |       |                        |              |       |
| Yes vs No                               | 1.15                 | 0.63 to 2.10 | 0.647 |                        |              |       |
| No. of BMs                              |                      |              |       |                        |              |       |
| 4-10 vs 1-3                             | 0.95                 | 0.51 to 1.78 | 0.972 |                        |              |       |
| >10 vs 1-3                              | 1.66                 | 0.56 to 4.91 | 0.356 |                        |              |       |
| Extracranial metastases at time of BMs  |                      |              |       |                        |              |       |
| Yes vs No                               | 1.55                 | 0.81 to 2.99 | 0.189 |                        |              |       |
| Stage                                   |                      |              |       |                        |              |       |
| IV vs I-III                             | 1.04                 | 0.48 to 2.25 | 0.929 |                        |              |       |
| Largest size of BM                      |                      |              |       |                        |              |       |
| >10 vs ≤10 mm                           | 0.87                 | 0.45 to 1.91 | 0.694 |                        |              |       |
| Disease-specific GPA                    |                      |              |       |                        |              |       |
| 0-1.5 vs 2.0-4.0                        | 1.67                 | 0.91 to 3.05 | 0.095 | 1.78                   | 0.97 to 3.27 | 0.064 |
| Symptom from BM                         |                      |              |       |                        |              |       |
| Yes vs No                               | 0.56                 | 0.28 to 1.10 | 0.094 | 0.53                   | 0.27 to 1.08 | 0.082 |
| Mutation                                |                      |              |       |                        |              |       |
| Exon 21 L858R and others vs 19 mutation | 1.33                 | 0.74 to 2.42 | 0.341 |                        |              |       |
| Use Osimertinib                         |                      |              |       |                        |              |       |
| Yes vs No                               | 0.27                 | 0.10 to 0.77 | 0.014 | 0.28                   | 0.10 to 0.78 | 0.015 |

Abbreviations: KPS, Karnofsky Performance Score; BM, brain metastasis; GPA, graded prognostic assessment; RT, radiation therapy; TKI, tyrosine kinase inhibitor; EGFR, epidermal growth factor receptor; TKI, tyrosine kinase inhibitor.
